# Supplementary material
Source: PubMed Central journal article supplement (PMC3243500)
Supplement: supp_M111.271593_jbc.M111.271593-1.pdf [file supp_M111.271593_jbc.M111.271593-1.pdf]

**MOLECULAR CHARACTERIZATION OF DISRUPTED IN SCHIZOPHRENIA-1 RISK VARIANT S704C REVEALS THE FORMATION OF ALTERED OLIGOMERIC ASSEMBLY**

Saravanakumar Narayanan<sup>1</sup>, Haribabu Arthanari<sup>1</sup>, Michael S. Wolfe<sup>2</sup>, Gerhard Wagner<sup>1</sup>

Department of Biological Chemistry and Molecular Pharmacology<sup>1</sup>, Harvard Medical School and Center for Neurologic Diseases<sup>2</sup>, Brigham and Women's Hospital, Boston, MA 02115

**Supporting information:**

Fig. S1 Fusion tags did not influence oligomerization of (a) DISC1 (b)/NDEL1 as well as (c) NDEL1 binding

a) MBP-DISC1 vs DISC1 oligomerization

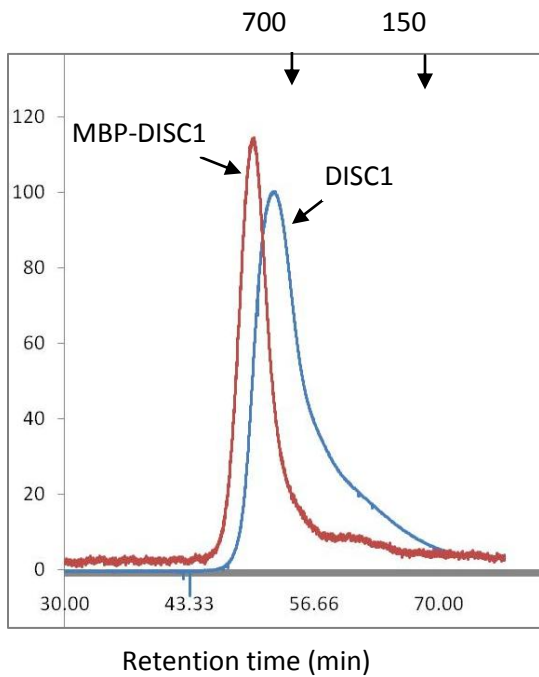

b) GB1- NDEL1 vs NDEL1 oligomerization

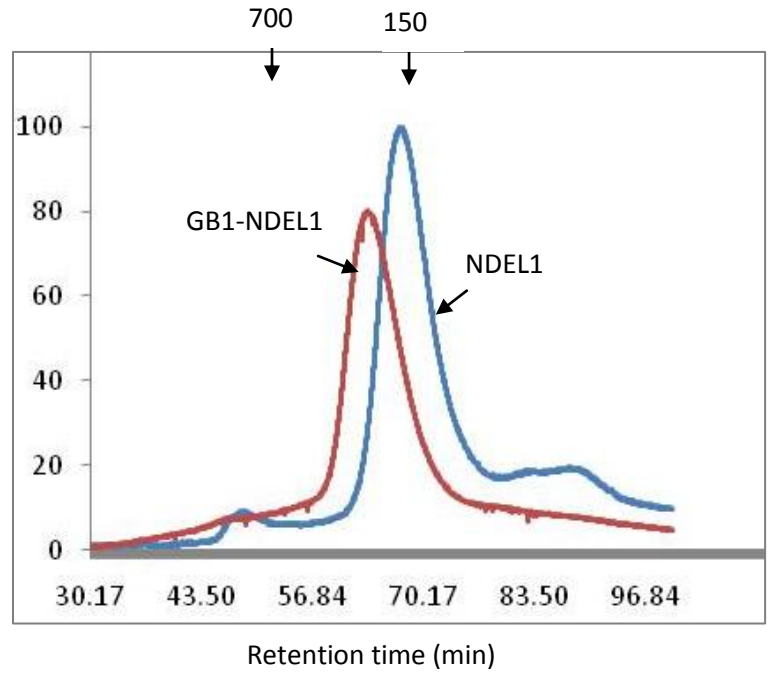

c) Pull-down assay confirm no influence of fusion tag on the complex formation

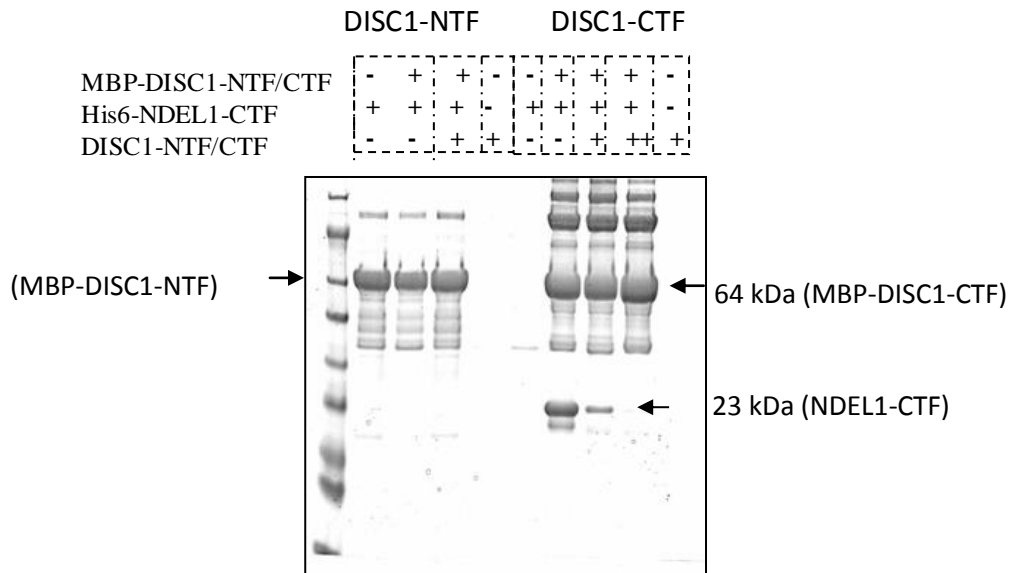

Size exclusion chromatography profile of a) MBP-DISC1 (Red) and DISC1(Blue) and b) GB1-NDEL1(Red) and NDEL1(Blue). The addition of MBP/GB1 tag did not influence the oligomerization of DISC1/NDEL1, as predominant oligomeric DISC1/NDEL1 peak remain intact. C. In order to show that the fusion protein has no influence on binding to NDEL1, we used two DISC1 constructs (supplementary table S1), MBP-DISC1 N-terminus (a.a 72-290) and MBP-DISC1C-terminus (a.a 680-832), in which the later contains the

## Schizophrenia-risk DISC1 interactions

NDEL1 binding site. Lysates of these expressed proteins together with NDEL1-CTF were co-incubated in amylose beads . After 3 hours, the beads were washed and the eluted proteins were subjected to SDS-PAGE analysis. His<sub>6</sub> -DISC1 C-terminus or N-terminus were used to compete for the binding. The C-terminal domain that encompasses NDEL1 binding site could pull-down the NDEL1 binding domain, while N-terminal DISC1 could not, clearly shows that the MBP has no influence in binding.

Fig: S2 DISC1 Secondary structure prediction and NDEL1 binding site

FWTAKDLTEEIRSLTSEREGLEGLLSKLLVLSSRNVKKLGSVKEDYNRLRREVEH  
QETAYETSVKENTMKYMETLKNKLCCKCPLLGKVWEADLEACRLLIQSLQLQEA  
RGSLSVEDERQMDLEGAAPPIPPRLHSEDKRKTPLKVLEEWKTHLIPSLHCAGG  
EQKEESYILSAELGEKCEDIGKLLYLEDQLHTAI**HS****H****SH****DE****DL****I****Q****S****L****R****R****E****L****Q****M****V****K****E**  
**TLQAMILQLQ****PAKE**AGEREAAASCMTAGVHEAQA

Secondary structure prediction of DISC1 ( DISC1-CTF shown here): Two independent prediction softwares were used: HNN( [http://npsa-pbil.ibcp.fr/NPSA/npsa\\_hnn.html](http://npsa-pbil.ibcp.fr/NPSA/npsa_hnn.html)) and Psipred ( <http://bioinf.cs.ucl.ac.uk/psipred/>). Predicted Helices are underlined (from HNN prediction) or represented by a line above the sequence (prediction from Psipred). Consistently both algorithms predict the NDEL1 binding site (marked in Red) is helical in nature.

## Schizophrenia-risk DISC1 interactions

Fig. S3 Equilibrium Analytical Ultracentrifugation experiment on DISC1 at various concentrations and speeds

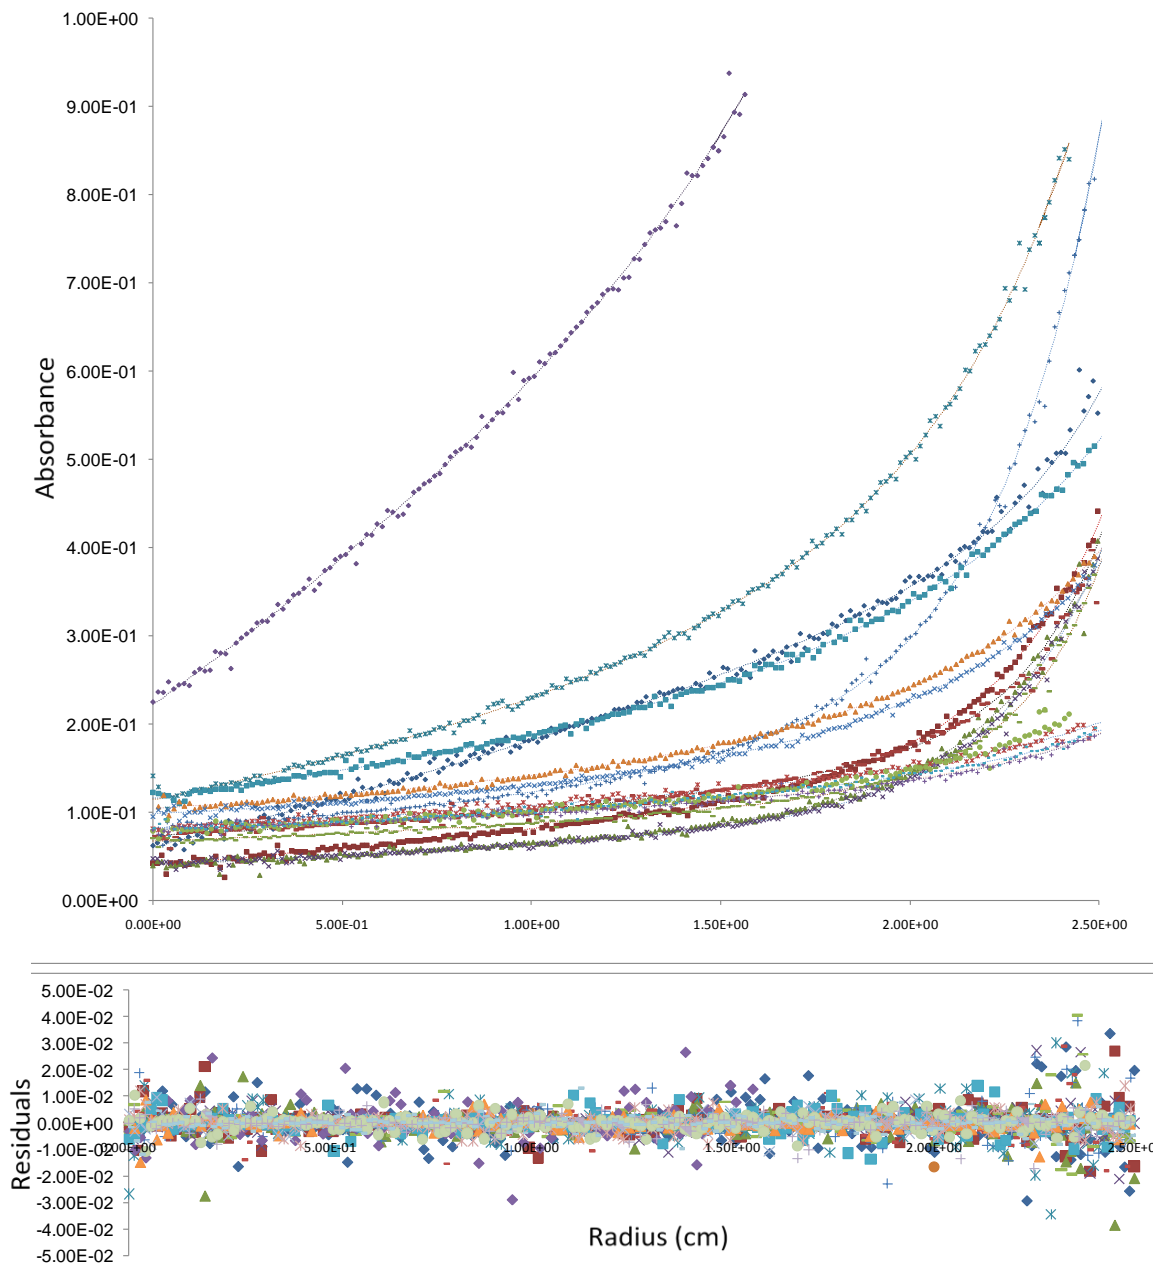

Equilibrium analytical ultracentrifugation (AUC) experiments on DISC1. The experimental data are represented in closed circles and model fitting are indicated in dotted line. The residues are plotted at the bottom panel. Colors represent fitting same model but independent data with different combination of centrifugal speeds as well as concentration.

## Schizophrenia-risk DISC1 interactions

Fig. S4 Equilibrium Analytical Ultracentrifugation experiment on NDEL1 at various concentrations and speeds

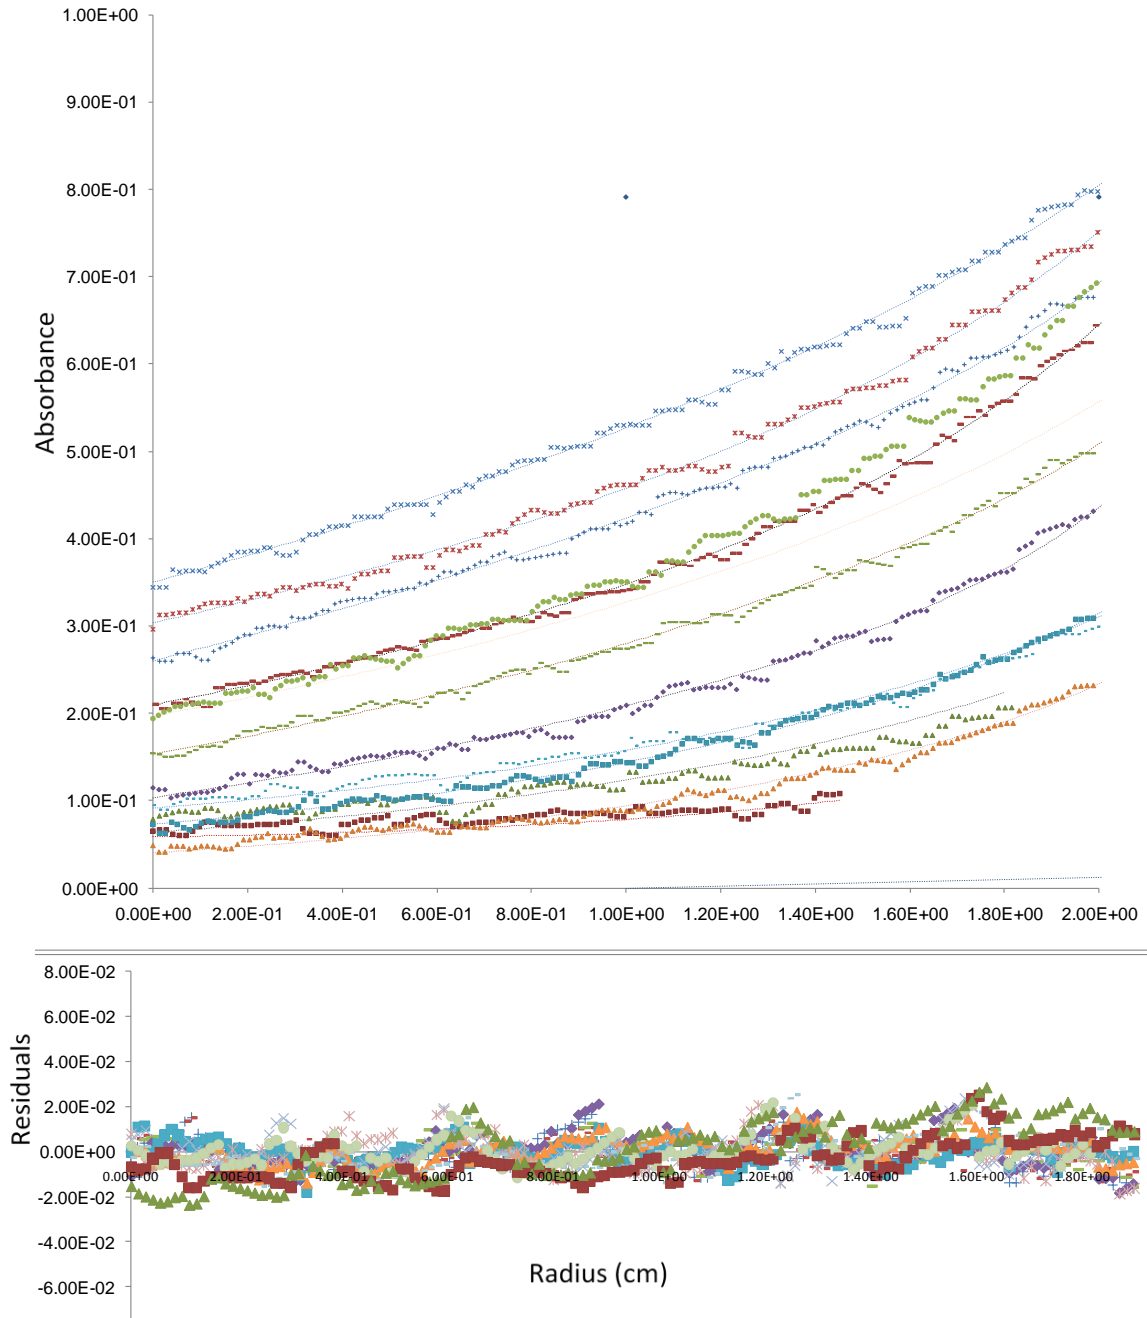

Equilibrium analytical ultracentrifugation (AUC) experiments on NDEL1. The experimental data are represented in closed circles and model fitting are indicated in dotted line. The residues are plotted at the bottom panel. Colors represent fitting same model but independent data with different combination of centrifugal speeds as well as concentrations.

Schizophrenia-risk DISC1 interactions

Fig. S5a. SDS-PAGE analysis of the co-eluted DISC1/NDEL1 complex.

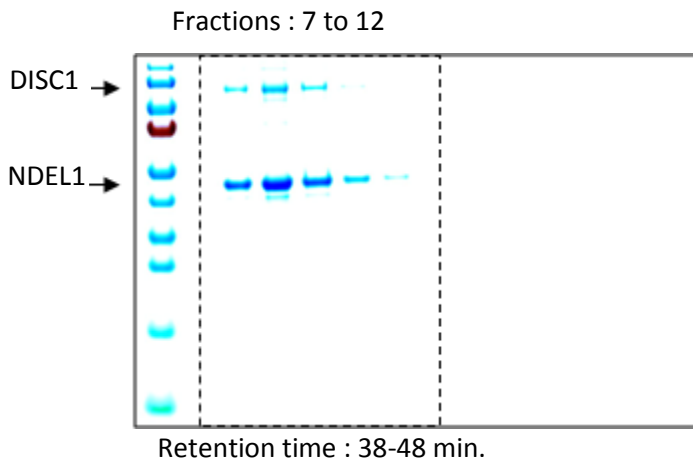

Fig. S5b. DISC1/NDEL1 interaction is mediated through oligomers of DISC1(320-854) and NDEL1.

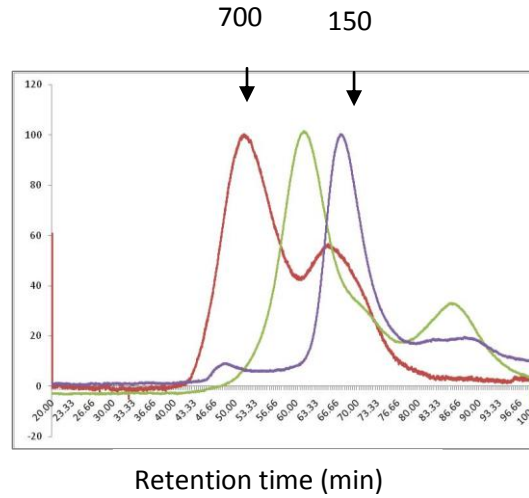

a) SDS-PAGE analysis of the co-elution of DISC1-NDEL1 by size exclusion chromatography confirms the stable complex formation of DISC1-NDEL1. b) Size exclusion chromatography profile of a) DISC1(320-854)/NDEL1 complex (Red) and DISC1(320-854) (Green) and b) NDEL1 (Purple). NDEL1 interaction with oligomers of DISC1 (320-854) is evident as the complex migrates within the characterization limit of superdex-200 size exclusion column.

Fig. S6 Control Isothermal titration calorimetry experiment

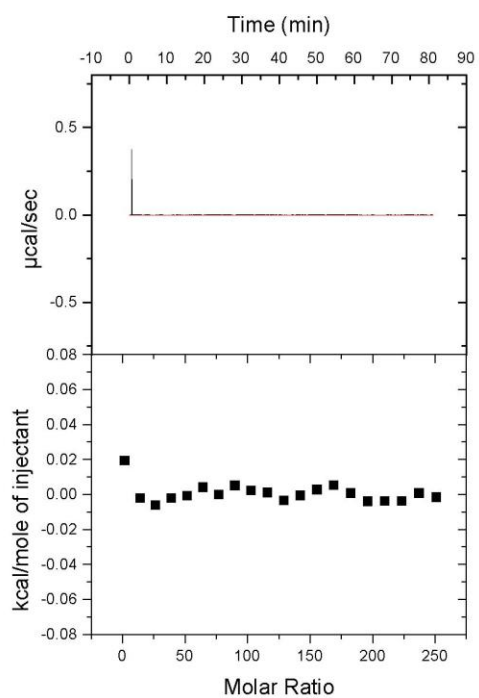

Performing isothermal titration calorimetry experiment on binding buffer upon titrating with NDEL1 confirms the heat of dilution is insignificant.



## Schizophrenia-risk DISC1 interactions

Fig. S7 Equilibrium Analytical Ultracentrifugation experiment on MBP-DISC1-S704C at various concentrations and speeds

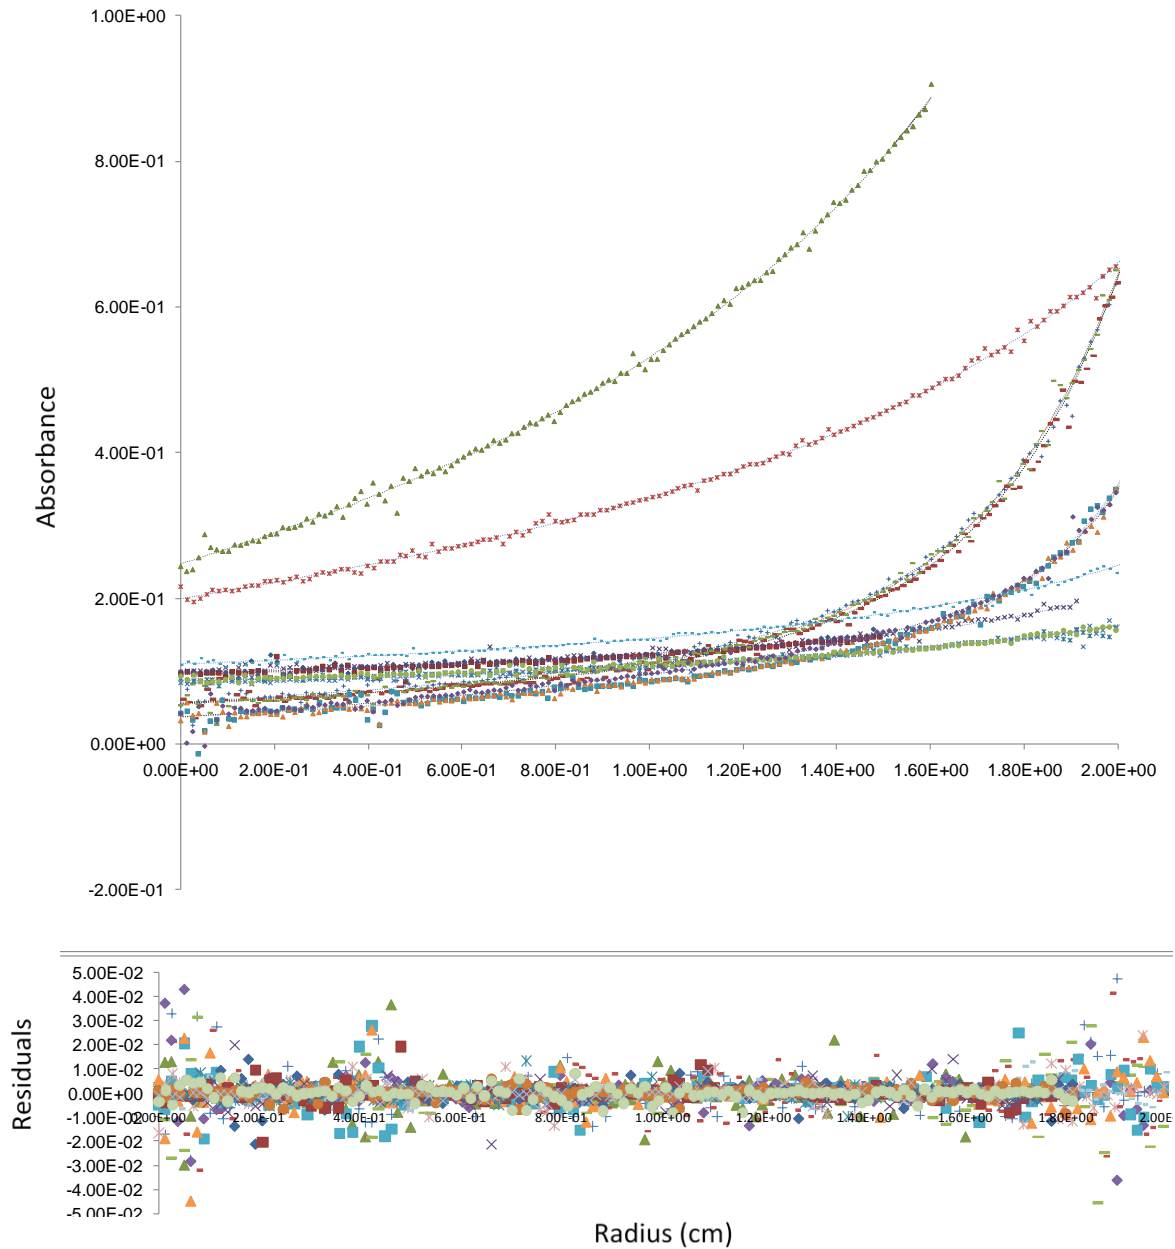

Equilibrium analytical ultracentrifugation (AUC) experiments on MBP-DISC1-S704C. The experimental data are represented in dots and model fitting are indicated in dotted line. The residues are plotted at the bottom panel. Colors represent fitting same model but independent data with different combination of centrifugal speeds as well as concentration.

Supplementary Table –S1 List of expression constructs used in this study

| Proteins used      | M.Wt (kDa) | Name of the construct   | Tag used     | Vector backbone | Restriction site |
|--------------------|------------|-------------------------|--------------|-----------------|------------------|
| MBP-DISC1 (WT)     | 135        | Full length DISC1       | MBP fusion   | pMal-C4E        | Sacl/HindIII     |
| DISC1 (WT)         | 93         |                         |              |                 |                  |
| MBP-DISC1-S704C    | 135        | Full length DISC1-S704C | MBP fusion   | pMal-C4E        | Sacl/HindIII     |
| DISC1-S704C        | 93         |                         |              |                 |                  |
| GB1-NDEL1          | 51         | Full length NDEL1       | N-GB1 fusion | PET-24b         | Sall/NotI        |
| NDEL1              | 43         |                         |              |                 |                  |
| DISC1-CTF          | 19         | DISC1(680-832)          | N-His7       | PET-24b         | EcorI/NotI       |
| DISC1-CTF          | 28         | DISC1(680-832)          | N-GB1 fusion | PET-24b         | EcorI/NotI       |
| DISC1-CTF          | 64         | DISC1(680-832)          | MBP fusion   | pMal-C2         | Sacl/BamH1       |
| DISC1-CTF(680-804) | 24         | DISC1(680-804)          | N-His7       | PET-24b         | EcorI/NotI       |
| DISC1-NTF          | 67         | DISC1(72-290)           | MBP fusion   | pMal-C2         | EcorI/NotI       |
| DISC1(320-834)     | 59         | DISC1(320-834)          | MBP fusion   | pMal-C4E        | Sacl/HindIII     |
| NDEL1-CTF          | 23         | NDEL1(122-314)          | N-His7       | PET-24b         | EcorI/NotI       |
